# Supplementary material for: Characterization of Tuna Gelatin-Based Hydrogels as a Matrix for Drug Delivery
Source: MDPI journal article supplement (doi:10.3390/gels8040237), 2022-04-12
Supplement: s1 [file s1]

SUPPLEMENTARY INFORMATION

# Characterization of Tuna Gelatin-Based Hydrogels as a Matrix for Drug Delivery

Carolina Hermida-Merino<sup>1,\*</sup>, David Cabaleiro<sup>1</sup>, Luis Lugo<sup>1</sup>, Jesus Valcarcel<sup>2</sup>, Jose A. Vázquez<sup>2</sup>, Ivan Bravo<sup>3</sup>, Alessandro Longo<sup>4,5</sup>, George Salloum-Abou-Jaoude<sup>6</sup>, Eduardo Solano<sup>7</sup>, Carlos Gracia-Fernández<sup>8</sup>, Manuel M. Piñeiro<sup>1</sup>, Daniel Hermida-Merino<sup>1,9\*</sup>

**Table S1.** The compilation of the major band assignments for Dry GE, 25GE, 25GE/Dox, and 25GE/Crocin at 25°C.

| Wavenumber (cm <sup>-1</sup> ) |                |                  |                  | Assignment                   |
|--------------------------------|----------------|------------------|------------------|------------------------------|
| Dry GE                         | 25 GE          | 25 GE/Dox        | 25 GE/Crocin     |                              |
| 3284                           | 3330           | 3297             | 3297             | N-H/O-H                      |
| 2850-3000                      | 2850-3000      | -                | -                | Aliphatic bond stretching CH |
| 1333, 1444                     | 1338, 1462     | -                | -                | Aliphatic bending CH         |
| 1631,1528,1238                 | 1634,1557,1244 | 1637, 1555, 1247 | 1635, 1558, 1248 | Amide I,II,III               |
| 975                            | -              | 973              | -                | CNC                          |
| 528,612,700                    | 532,607,704    | -                | -                | Amide IV,V,VI                |
| 1164-1080                      | 1165,1082,1032 | 1200-1011        | 1200-1028        | Bond stretching C-O, C-O-C   |
| 600                            | 600            | 652              | 654              | Water                        |
| -                              | -              | 621              | -                | N-C=O                        |

**Table S2.** Major band assignments for Dry GE, 25GE, 25GE/Dox, and 25GE/Crocin at 50°C.

| Wavenumber (cm <sup>-1</sup> ) |                  |                  |                  | Assignment                   |
|--------------------------------|------------------|------------------|------------------|------------------------------|
| Dry GE                         | 25 GE            | 25 GE/Dox        | 25 GE/Crocin     |                              |
| 3284                           | 3280             | 3285             | 3285             | N-H/O-H                      |
| 2850-3000                      | 2850 - 3000      | 2890 - 3000      | 2890 - 3000      | Aliphatic bond stretching CH |
| 1334, 1447                     | 1334, 1447       | 1300-1447        | 1335-1447        | Aliphatic bending CH         |
| 1633, 1519, 1236               | 1627, 1530, 1239 | 1630, 1529, 1237 | 1630, 1529, 1237 | Amide I,II,III               |
| 920                            | -                | 973              | 973              | CNC                          |
| 561, 660, 703                  | 556, 657, 704    | -                | -                | Amide IV,V,VI                |
| 1163, 1080, 1031               | 1164, 1080, 1032 | 1200-1031        | -                | Bond stretching C-O, C-O-C   |
| 600                            | 600              | 652              | -                | Water                        |
| -                              | -                | 621              | -                | N-C=O                        |
| -                              | -                | 1730             | -                | C=O from Dox                 |

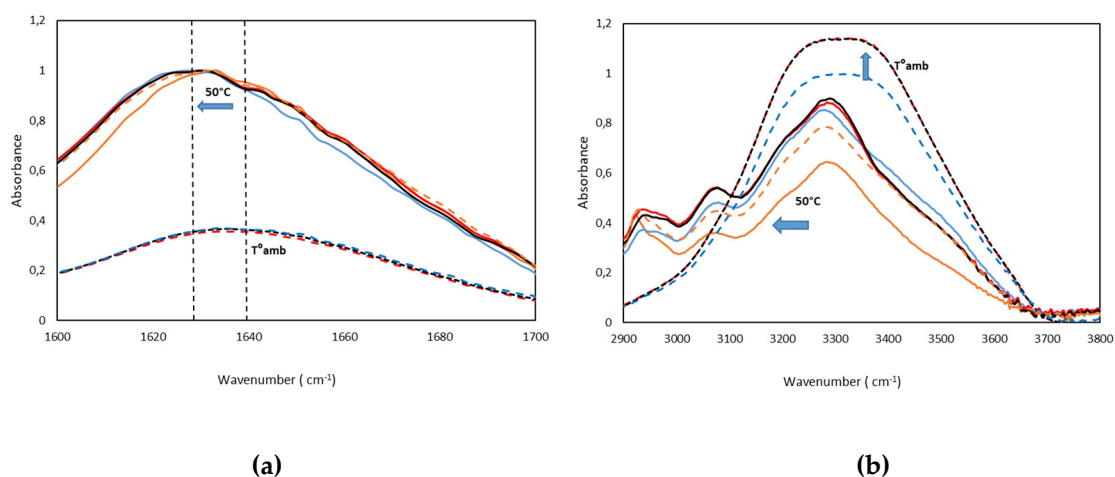

**Figure S1.** (a) Comparison of FTIR spectra at room temperature (dashed lines) and FTIR spectra at 50°C (solid lines) in the 1600-1700  $\text{cm}^{-1}$  region, (b) Comparison of FTIR spectra at room temperature (dashed lines) and FTIR spectra at 50°C (solid lines) in the 2900-4000  $\text{cm}^{-1}$  region, of (-) Dry GE, (-) 25GE, (-) 25GE/DOX and (-) 25GE/Crocin.

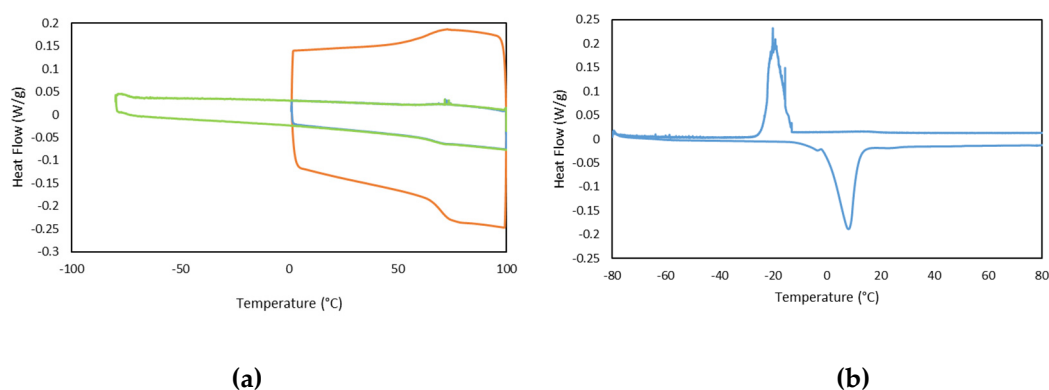

**Figure S2.** (a) DSC thermogram of Dry GE at 5°C·min $^{-1}$  (orange colour) and 1°C·min $^{-1}$  (green colour), (b) DSC thermogram of 25GE at 1°C·min $^{-1}$ .

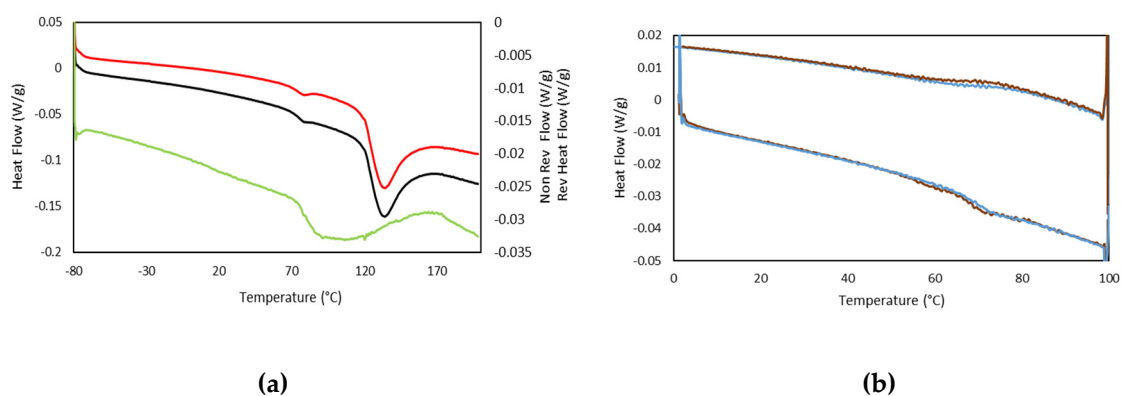

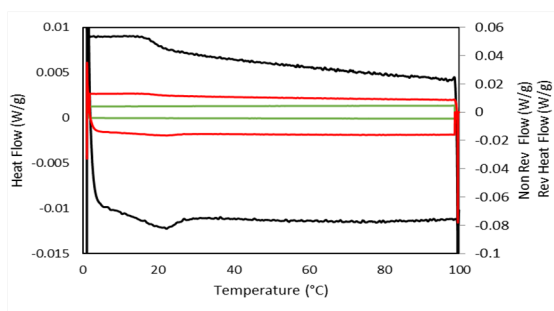

c)

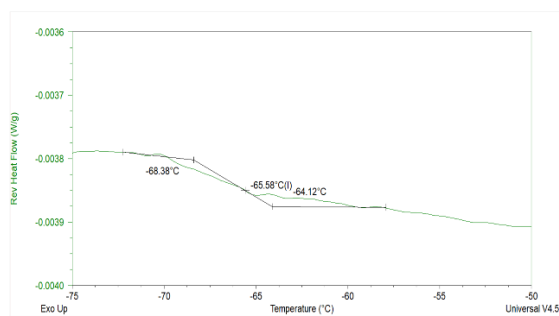

d)

**Figure S3.** MDSC of (a) Dry GE in the Rev Heat Flow (green colour), Non Rev. Heat Flow (Black colour) and Heat Flow (red colour), (b) Dry GE at 1K/min (Two reps), (c) 25GE in the Rev Heat Flow (green colour), Non Rev. Heat Flow (Black colour) and Heat Flow (red colour), (d) MDSC of 25GE in the Reversing Heat Flow.
